# Supplementary material for: PADI4 and IL-33 gene polymorphisms associated with differential susceptibility to juvenile-onset systemic lupus erythematosus and juvenile idiopathic arthritis in Chinese children
Source: PubMed Central journal article supplement — Medicine (Baltimore). 2022 Dec 16;101(50):e31598. doi: 10.1097/MD.0000000000031598 (PMC9771228; doi:10.1097/md.0000000000031598), 2022-12-16
Supplement: medi-101-e31598-s001.pdf [file medi-101-e31598-s001.pdf]

**Supplementary Table 1. Information of SNPs in PADI4 and IL-33 genes.**

| Genes | SNPs      | Chr. Location | Region in Gene | Alleles* |
|-------|-----------|---------------|----------------|----------|
| PADI4 | rs2240337 | 1:17347727    | Intron         | T/C      |
| PADI4 | rs2240340 | 1:17336144    | Intron         | T/C      |
| IL-33 | rs1891385 | 9:6219845     | Intron         | A/C      |
| IL-33 | rs1929992 | 9:6251588     | Intron         | C/T      |

Chr.: chromosome; UTR: Untranslated Regions.

\* Major allele/minor allele
