# Supplementary material for: PADI4 and IL-33 gene polymorphisms associated with differential susceptibility to juvenile-onset systemic lupus erythematosus and juvenile idiopathic arthritis in Chinese children
Source: PubMed Central journal article supplement — Medicine (Baltimore). 2022 Dec 16;101(50):e31598. doi: 10.1097/MD.0000000000031598 (PMC9771228; doi:10.1097/md.0000000000031598), 2022-12-16
Supplement: medi-101-e31598-s002.pdf [file medi-101-e31598-s002.pdf]

**Supplementary Table 2. Sequences of primers used for systematic search for SNPs in PADI4 and IL-33**

| SNP/rs number   | primer  | Sequence                   |
|-----------------|---------|----------------------------|
| PADI4 rs2240337 | Forward | 5'-GTCTCAGTTTTGCTCACCAG-3' |
|                 | Reverse | 5'-AGTGCACGAGAGGCCATGAG-3' |
| PADI4 rs2240340 | Forward | 5'-CTCTGGTTGGCTTCACTTTG-3' |
|                 | Reverse | 5'-GGACCCTCACCAACCTCTC-3'  |
| IL-33 rs1891385 | Forward | 5'-CCTGACCCTGGACTTTAATC-3' |
|                 | Reverse | 5'-TATGAAATTGAGACAGTGG-3'  |
| IL-33 rs1929992 | Forward | 5'-CCCATGGTCATTAGTTTTGG-3' |
|                 | Reverse | 5'-TAGCTCTTTTCTTTCATGG-3'  |
