# Supplementary material for: PADI4 and IL-33 gene polymorphisms associated with differential susceptibility to juvenile-onset systemic lupus erythematosus and juvenile idiopathic arthritis in Chinese children
Source: PubMed Central journal article supplement — Medicine (Baltimore). 2022 Dec 16;101(50):e31598. doi: 10.1097/MD.0000000000031598 (PMC9771228; doi:10.1097/md.0000000000031598), 2022-12-16

Supplementary Figure S1 The genotypes of the four SNPs in PADI4 and IL-33 A. PADI4 rs2240337 T/C, B. PADI4 rs2240340 T/C, C. IL-33 rs1891385 A/C, D. IL-33 rs1929992 C/T.

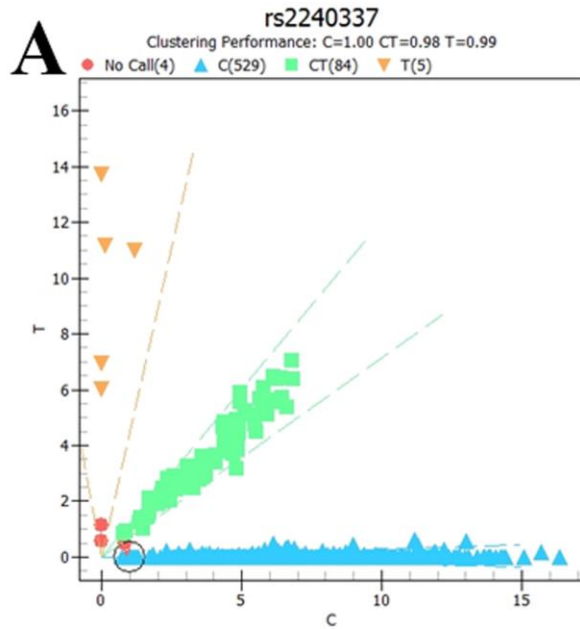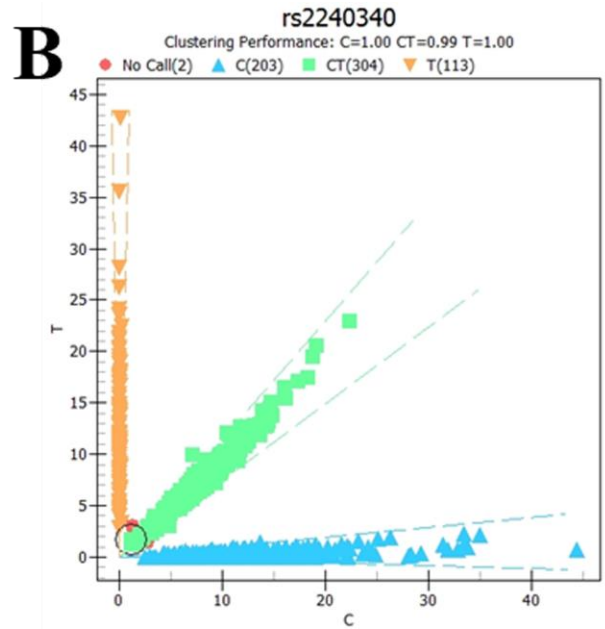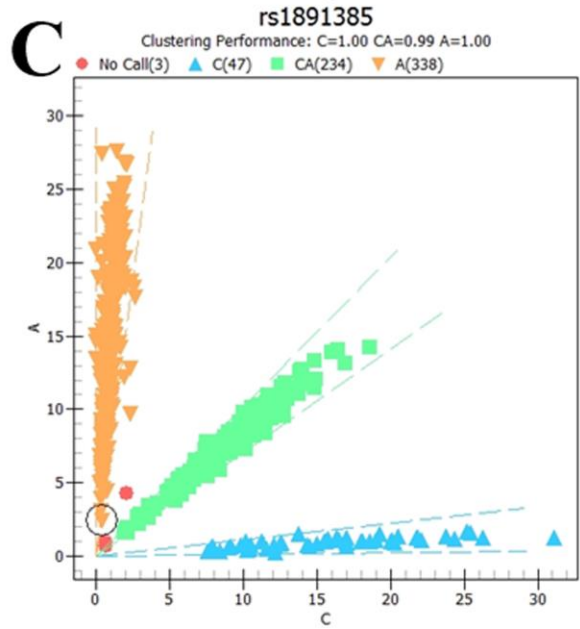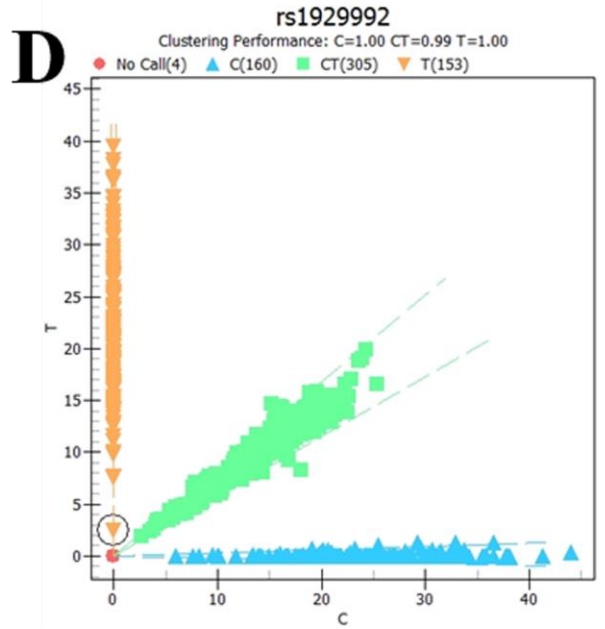

Supplement: medi-101-e31598-s003.pdf [file medi-101-e31598-s003.pdf]
